# Supplementary material for: Notch is required for the formation of all nephron segments and primes nephron progenitors for differentiation
Source: Oxford University Press journal article supplement (doi:10.1242/dev.156661), 2017-11-09
Supplement: dev156661supp.pdf [file dev156661supp.pdf]

**Table S1. Antibodies**

| Antigen      | Vendors             | Catalog #  | Host   | dilution |
|--------------|---------------------|------------|--------|----------|
| Six2         | Proteintech         | 11562-1-AP | rabbit | 1:500    |
| GFP          | Aves                | GFP-1020   | chick  | 1:500    |
| Jag1         | DSHB                | TS1.15H    | rat    | 1:20     |
| Lhx1         | DSHB                | 4F2        | mouse  | 1:20     |
| Pax2         | Proteintech         | 21385-1-AP | rabbit | 1:200    |
| Wt1          | Santa Cruz          | sc-192     | rabbit | 1:200    |
| Wt1          | Santa Cruz          | sc-7385    | mouse  | 1:100    |
| biotin-LTL   | Vector Laboratories | B-1325     |        | 1:900    |
| Slc12a1      | Proteintech         | 18970-1-AP | rabbit | 1:500    |
| Slc12a3      | Sigma-Aldrich       | HPA028748  | rabbit | 1:300    |
| Cdh1         | Santa Cruz          | sc-59778   | rat    | 1:500    |
| Cytokeratin  | Sigma-Aldrich       | C2562      | mouse  | 1:200    |
| $\beta$ -gal | MPbio               | 559761     | rabbit | 1:15000  |
| $\beta$ -gal | Abcam               | ab9361     | chick  | 1:300    |
| Hnf1b        | Proteintech         | 12533-1-AP | rabbit | 1:200    |
| Mafb         | Sigma               | HPA005653  | rabbit | 1:300    |
| Lama1        | Sigma               | L9393      | rabbit | 1:10000  |

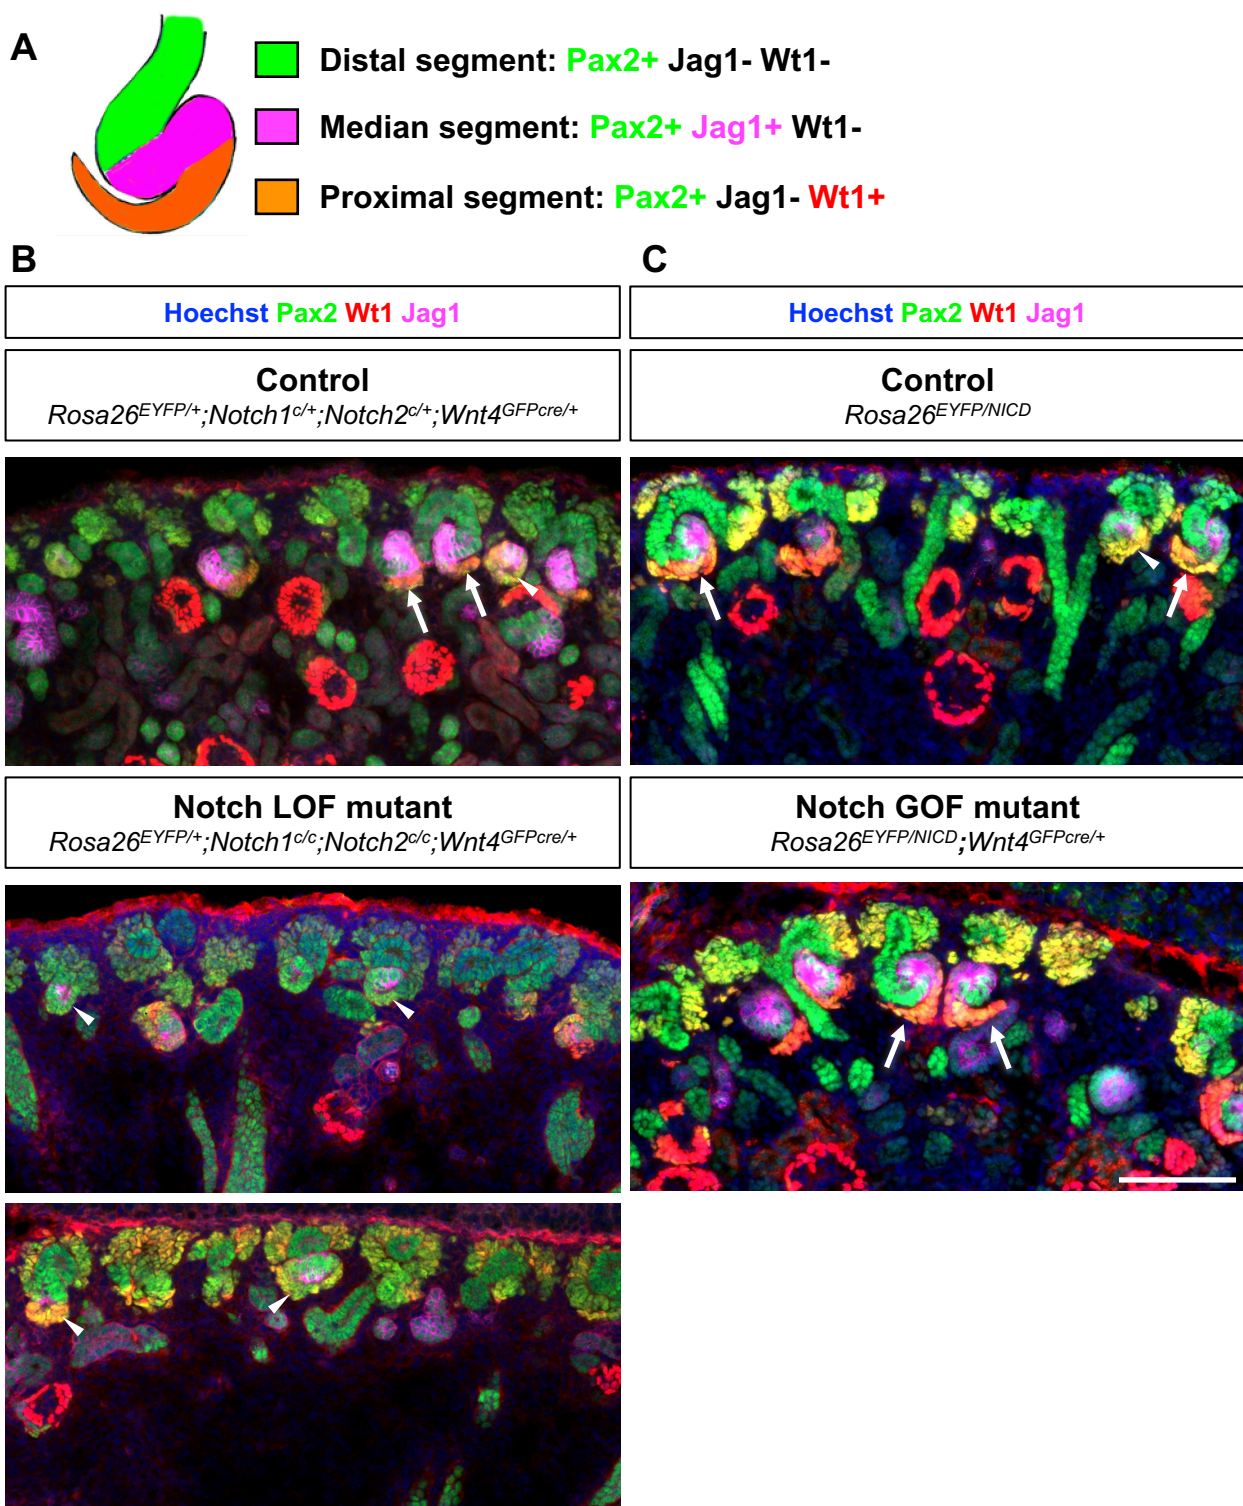

**Fig. S1. The S-shaped body (SSB) is absent in the Notch loss-of-function (LOF) mutant kidney but present in the Notch gain-of-function (GOF) mutant kidney** (A) Schematic diagram of SSB segments and markers (B) The Notch LOF mutant kidney forms renal vesicles (marked with white arrowheads) but fails to form SSB (marked with white arrows). (C) The Notch GOF mutant kidney forms SSB (marked with white arrows). (B-C) Embryonic kidneys at E18.5 are shown. Scale bar, 100 $\mu$ m



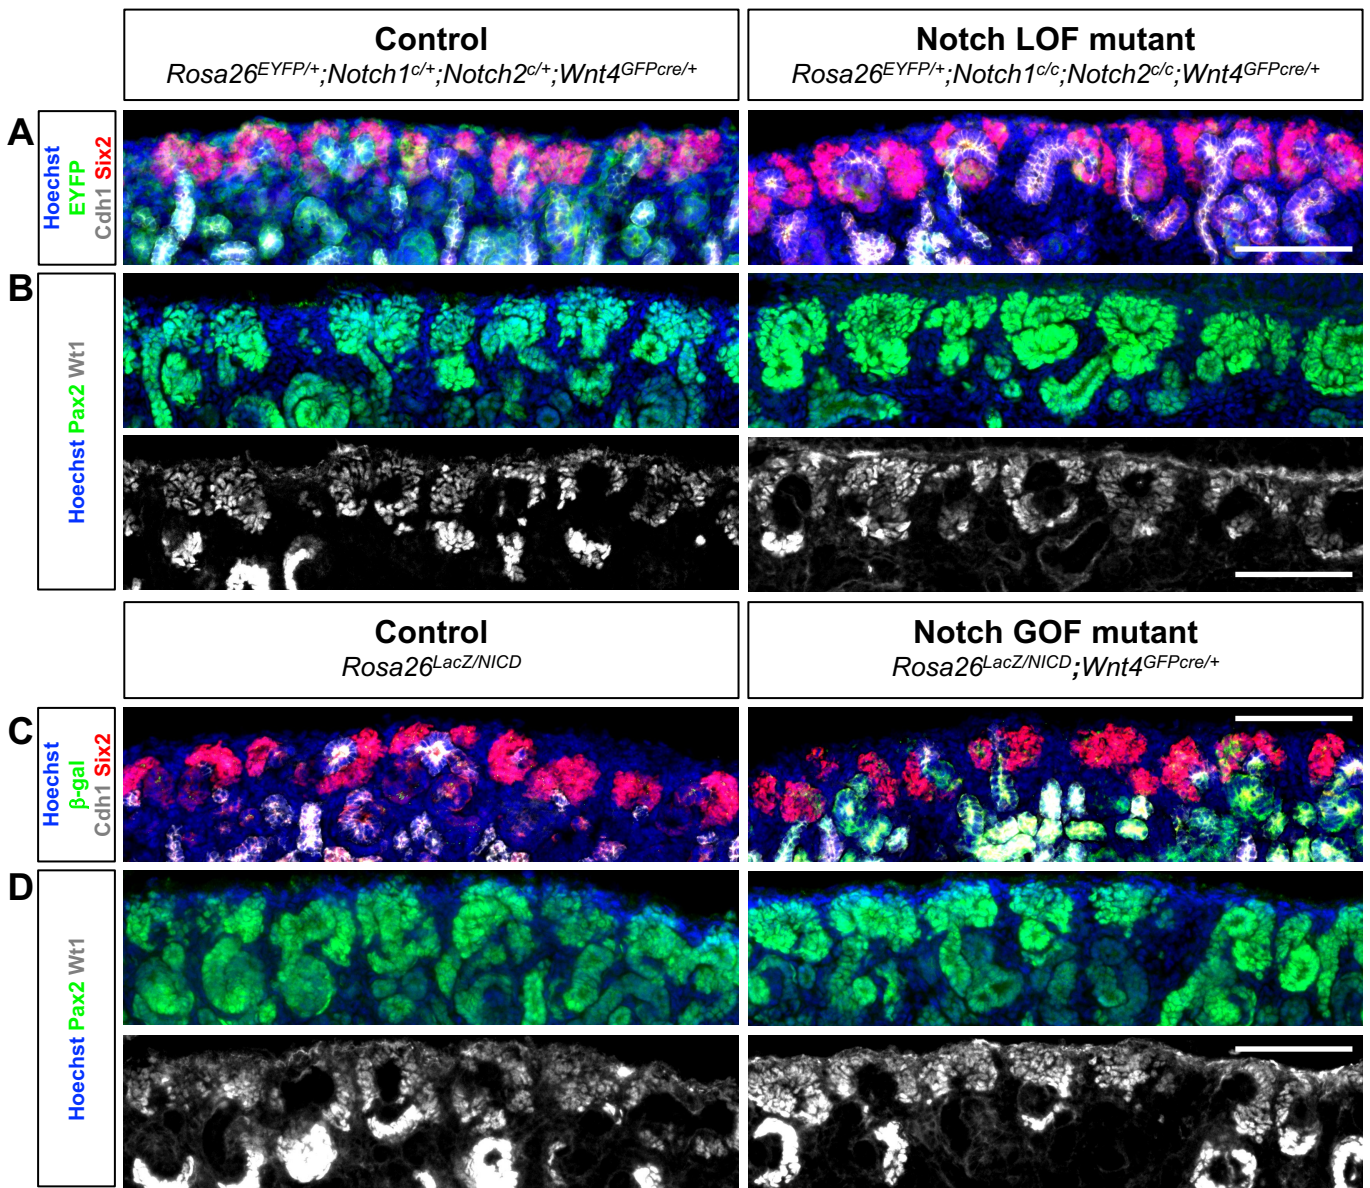

**Fig. S2. Genetic manipulation of Notch signaling with *Wnt4GFPcre* does not affect mesenchymal nephron progenitor cells** (A) Six2<sup>+</sup> cells are not prematurely depleted in the Notch LOF mutant kidney even with *Wnt4GFPcre* targeting a subset of Six2<sup>+</sup> cells. (B) Deletion of Notch by *Wnt4GFPcre* does not affect *Pax2* and *Wt1* expression in the mesenchymal nephron progenitors. *Pax2* is also expressed in the collecting duct and developing nephrons. (C) Six2<sup>+</sup> cells are not prematurely depleted in the Notch GOF mutant kidney. The *R26R* reporter is inactive in the control kidney because it lacks *Wnt4GFPcre*. (D) Constitutive activation of Notch signaling by *Wnt4GFPcre* does not affect *Pax2* and *Wt1* expression in the mesenchymal nephron progenitors. (A-D) Embryonic kidneys at E18.5 are shown. Scale bars, 100µm



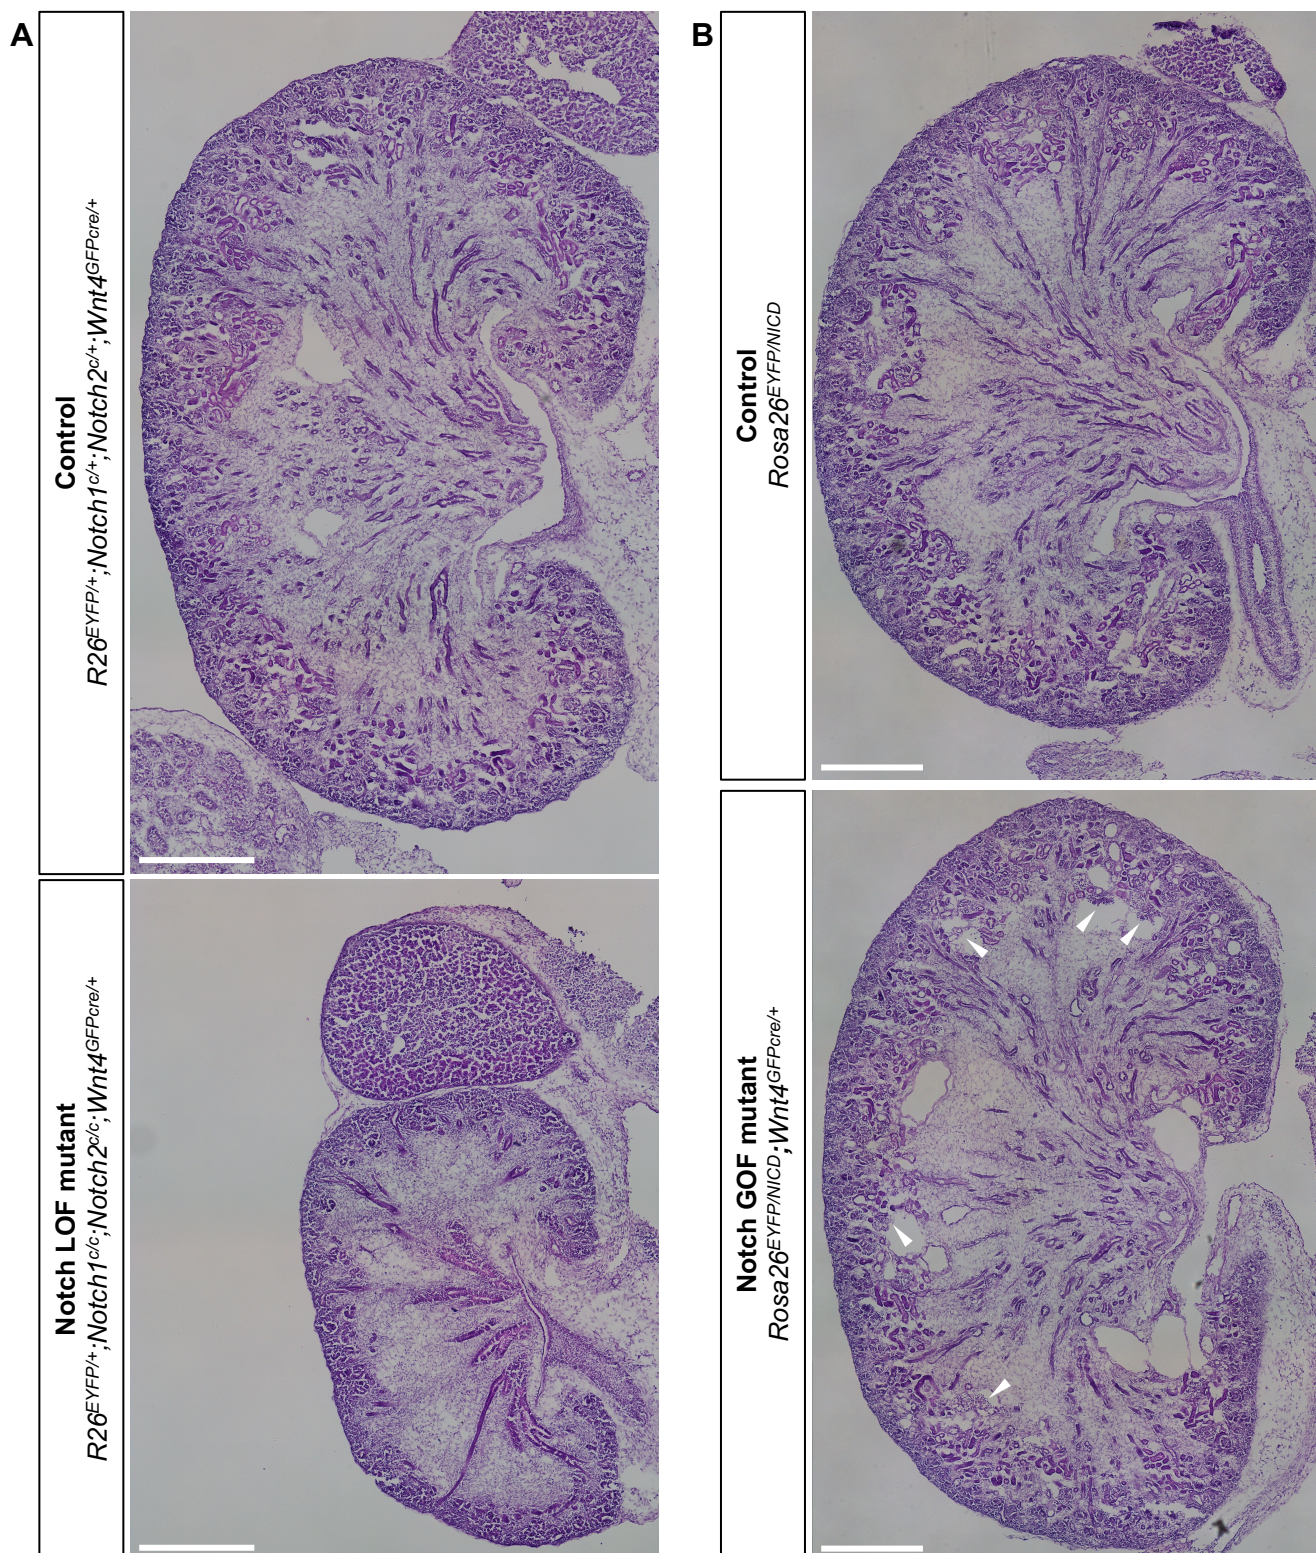

**Fig. S3. Histology of Notch LOF and GOF mutant kidneys** (A) H&E staining shows paucity of nephron tubules in the Notch LOF mutant kidney (B) The Notch GOF mutant kidney shows relatively normal nephrogenesis except for the formation of glomerulocysts (marked with white arrowheads). (A-B) Embryonic kidneys at E18.5 are shown. Scale bars, 500µm



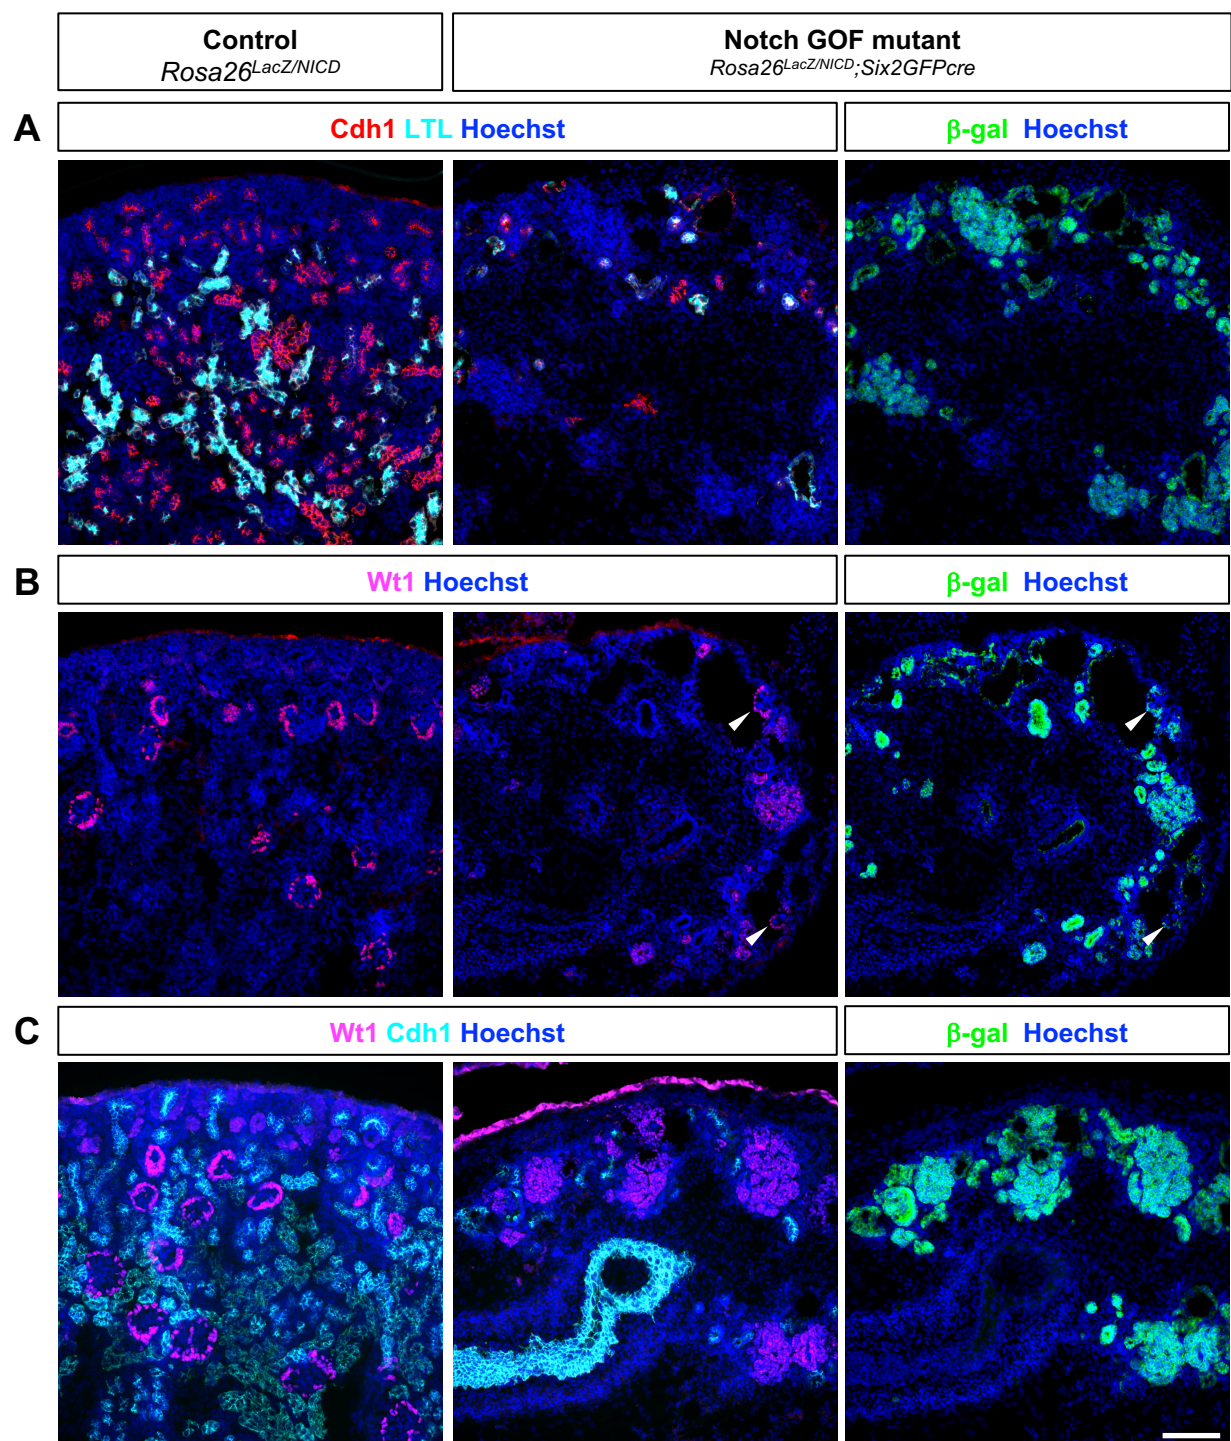

**Fig. S4. Constitutive activation of Notch signaling by *Six2GFPcre* leads to the formation of a heterogeneous population of cells, rather than proximal tubules exclusively** (A-C) Notch GOF mutant cells are labeled with the *R26R* reporter ( $\beta$ -gal). The *R26R* reporter is inactive in the control kidney because it lacks *Six2GFPcre*. P0 kidneys are shown. Scale bar, 100 $\mu$ m (A) Only a subset of the Notch GOF mutant cells differentiate into LTL+ proximal tubule cells. *Cdh1* was used as an epithelial marker. LTL+ proximal tubules are positive for *Cdh1* in both control and mutant kidney. (B) The Notch GOF kidney forms glomerulocysts (marked with white arrowheads). (C) A significant portion of Notch GOF mutant cells are positive for *Wt1* and negative for *Cdh1*.

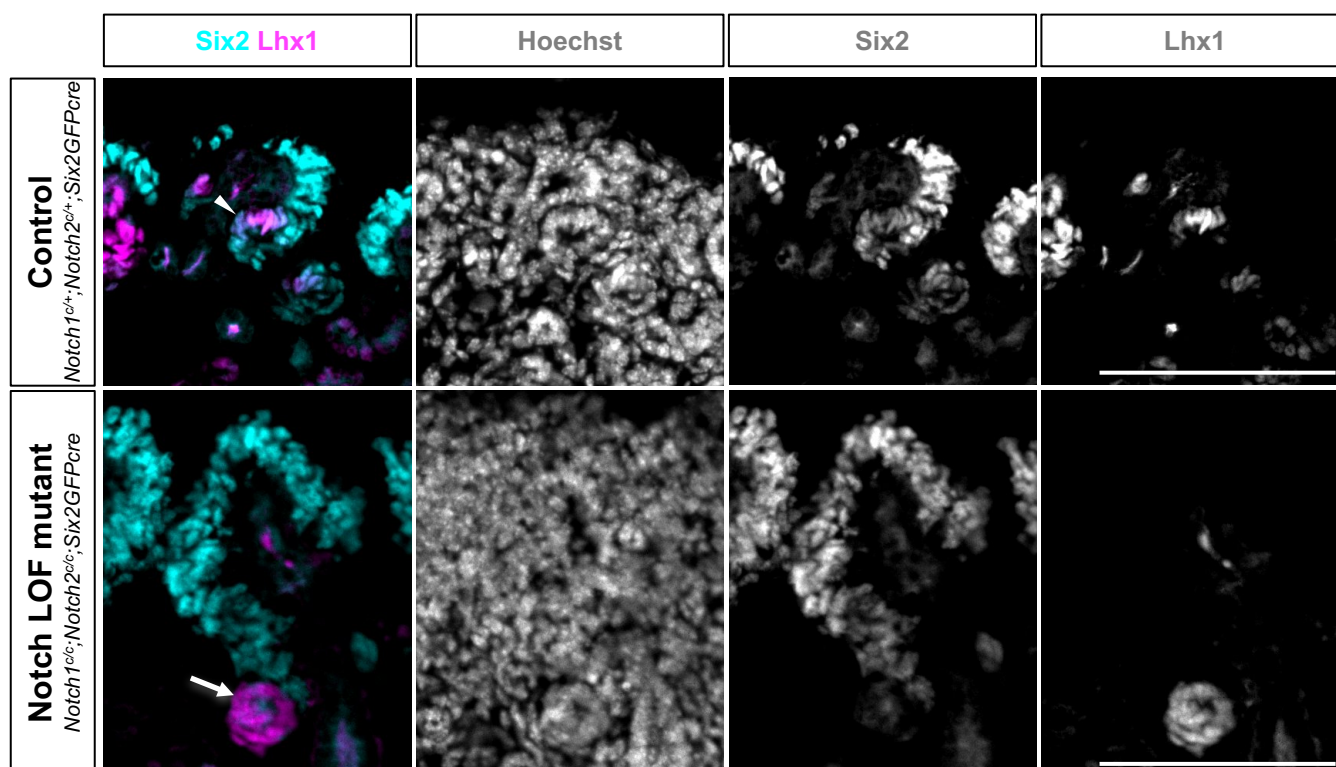

**Fig. S5. Notch signaling is required for the establishment of proper proximodistal axis in the renal vesicle** In the control kidney, *Lhx1* is expressed in the distal part of the renal vesicle (marked with a white arrowhead), indicating the existence of the proximodistal axis in the renal vesicle. When *Notch1* and *Notch2* are deleted with *Six2GFPcre*, *Lhx1* is expressed in the entire renal vesicle (marked with a white arrow), suggesting that the mutant renal vesicle fails to establish a proper proximodistal axis. Note that the renal vesicle in the Notch loss-of-function mutant kidney is located deeper toward the medullary side due to inefficient downregulation of *Six2*. P0 kidneys are shown. Scale bars, 100 $\mu$ m
